# Supplementary material
Source: Springer Nature journal article supplement (https://www.springermedizin.de/resource/supplementary/12903_2014_510_MOESM3_ESM.pdf/9517010)
Supplement: MOESM3 [file 9517010]

**CROSS-SECTIONAL  
POPULATION-BASED STUDY**

**SAMPLE CALCULATION**

Schools : n = 83  
Population: 4000 students aged 12 years  
Sample of 1389 students

**Public Schools**  
n = 43

**Private Schools**  
n = 40

**Participating  
schools**  
n = 42

**Non-  
participating  
schools**  
n = 1

**Participating  
schools**  
n = 23

**Non-  
participating  
schools**  
n = 17

**Participating students**  
n = 787

**Participating students**  
n = 658

**Total students investigated**  
n = 1445

**Total students used in  
analysis**  
n = 1118
